# Supplementary material for: Comparison of the physical and thermodynamic stability of amorphous azelnidipine and its coamorphous phase with piperazine
Source: Royal Society of Chemistry journal article supplement (doi:10.1039/c8ra05535a), 2018-01-01
Supplement: c8ra05535a1.pdf [file c8ra05535a1.pdf]

### Supporting information

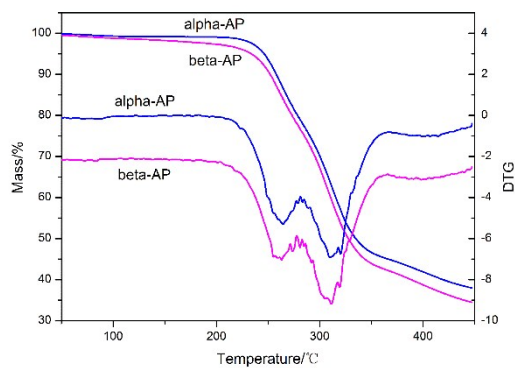

Fig.S1 TG and DTG of the two APs

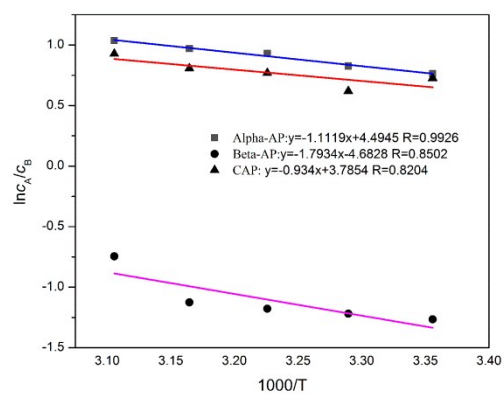

Fig.S2 Curves of  $\ln c_A/c_B \sim 1000/T$  of AZE system in 0.01M HCl medium.
